# Supplementary material
Source: publisher figshare collection journal article supplement (https://sage.figshare.com/ndownloader/files/28835923)

## **SUPPLEMENTAL INFORMATION**

### **Comparative effectiveness and safety of edoxaban vs warfarin in patients with atrial fibrillation:**

#### **A nationwide cohort study**

Peter Brønnum Nielsen<sup>1,2</sup>, PhD

Mette Søgaaard<sup>1,2</sup>, PhD

Martin Jensen<sup>1</sup>, MSc

Anne Gulbech Ording<sup>2</sup>, PhD

Gregory Y. H. Lip<sup>1,3</sup>, MD

<sup>1</sup>Aalborg Thrombosis Research Unit, Department of Clinical Medicine, Faculty of Health, Aalborg University, Aalborg, Denmark

<sup>2</sup>Department of Cardiology, Aalborg University Hospital, Aalborg, Denmark

<sup>3</sup>Liverpool Centre for Cardiovascular Science, University of Liverpool and Liverpool Heart & Chest Hospital, Liverpool, United Kingdom

#### **Supplemental methods**

**Supplemental Table 1:** ICD10 codes and ATC-codes

**Supplemental Table 2:** Number of events and event rates per 100 person-years for each component in the safety outcome

**Supplemental Table 3:** Subgroup analyses of comparative effectiveness and safety outcomes in inverse probability weighted populations

**Supplemental Table 4:**

**Supplemental Figure 1:** Flowchart of the study population

**Supplemental Figure 2:** Propensity score plot for edoxaban 30mg and warfarin users

**Supplemental Figure 3:** Standardized event free survival curves of thromboembolism

**Supplemental Figure 4:** Standardized survival curves for all-cause mortality

**Supplemental Figure 5:** Standardized event free survival curves of bleeding outcome

## **Supplemental methods**

### *Setting and data sources*

The Danish National Health Service provides tax-supported health care to the entire population <sup>1</sup>.

Nationwide registries track vital status, diagnoses, and procedures for all residents. Data can be linked across registries using the unique civil registration number assigned to all Danish residents at birth or upon immigration. Migration, sex, and vital status are tracked by the Civil Registration System (CRS) <sup>2</sup>. The Danish National Patient Registry covers all Danish hospitals and records all clinical inpatient discharge diagnoses since 1977 and diagnoses made at outpatient clinic visits since 1995 <sup>3</sup>. The Danish National Prescription Database records information on prescription claims from outpatient pharmacies since 2004 using the Anatomical Therapeutic Chemical (ATC) Classification System <sup>4</sup>. The Danish National Laboratory Registry has recorded clinical, biochemical and immunological measurements since 2013 based on the international Nomenclature for Properties and Units coding <sup>5</sup>. (See applied diagnoses and ATC codes in Supplemental Table 1).

### *Modelling approach*

Data were arranged accordingly such that each patient-month was represented by a single row (maximum of 24 per individual, corresponding to 2 years). The pooled logistic regression models estimated the average treatment effect under the strong assumption of no unmeasured confounding. Risk of outcomes were assessed through the models by including an additional interaction term between exposure variables and time. This allowed for construction of standardized outcome-free survival curves within exposure groups.

### *Sensitivity analyses*

We conducted the following sensitivity analyses to assess the robustness of our results: 1) The cohort was restricted in various subgroup analyses, including i) OAC naïve patients defined as no prescription claim of any anticoagulant treatment within the last year; ii) age 75 years or older; iii) affected renal function defined as an eGFR <90 ml/min/1.73m<sup>2</sup> ; iv) ‘very high’ stroke risk defined as a CHA<sub>2</sub>DS<sub>2</sub>-VASc score of 4 or higher. 2) Since stroke in some cases can be fatal and therefore not recorded as a stroke, we investigated competing risk of death by keeping person-time in the analytic dataset after death was recorded (i.e. death did not prompt administrative censoring) <sup>6</sup>. 3) To allow for a thorough evaluation of the safety outcome, we restricted the bleeding events to those events leading to hospitalization. 4) All-cause mortality and thromboembolic events was examined as a composite outcome. 5) Last, the all-cause mortality outcome was explored post-hoc to examine clinical characteristics associated with the mortality difference in the two treatment groups.

### *Ethics*

The study was performed in compliance with the General Data Protection Regulation, by the North Denmark Region’s record of processing activities (project no. 2017-40). No ethics approval or informed consent were needed according to Danish law for studies that does not involve patient contact.

### *Additional analyses*

To allow for comparisons between edoxaban 30mg and warfarin, a post-hoc decision was made to contrast outcomes for the two treatment alternatives using a propensity score matching approach. This necessitated a change in the original research question of interest, i.e. what would be the expected

outcomes had the entire population receive (e.g.) edoxaban 60mg vs edoxaban 30mg vs warfarin – to the question, among those who received edoxaban 30mg what would have happened if they was changed to warfarin treatment. In details, the estimand was changed from the original average treatment effect in the population (ATE) to the average treatment effect among the treated (ATT).<sup>7</sup> The following covariates were included to established a propensity score matched cohort, where patients receiving edoxaban 30mg was considered the treated and warfarin users the untreated: sex, age (continuous), eGFR (continuous), ischemic heart disease, previous intracerebral bleeding, heart failure, diabetes, hypertension, prior thromboembolic event, vascular disease, use of statin or aspirin within the last year, a cancer diagnosis within last three years, and OAC experience status (binary). A 1:1 matching was selected with a (mahalanobis distance) caliper of 0.1 and no replacement after a match. After matching, a total of 456 edoxaban 30mg users were matched with 456 warfarin users; see supplemental Figure 2 for plots of the propensity score distribution, and supplemental Table 4 for baseline characteristics. Supplemental Figure 3-5 displays the outcome analyses for thromboembolism, bleeding outcome, and all-cause mortality.

## Reference

1. Frank L. Epidemiology. When an entire country is a cohort. *Science*. 2000;287:2398–9.
2. Schmidt M, Pedersen L, Sorensen HT. The Danish Civil Registration System as a tool in epidemiology. *Eur. J. Epidemiol.* 2014;29:541–549.
3. Schmidt M, Schmidt SA, Sandegaard JL, Ehrenstein V, Pedersen L, Sorensen HT. The Danish National Patient Registry: a review of content, data quality, and research potential. *Clin. Epidemiol.* 2015;7:449–490.
4. Pottegård A, Schmidt SAJ, Wallach-Kildemoes H, Sørensen HT, Hallas J, Schmidt M. Data Resource Profile: The Danish National Prescription Registry. *Int. J. Epidemiol.* 2017;46:798-798f.

5. Grann AF, Erichsen R, Nielsen AG, Froslev T, Thomsen RW. Existing data sources for clinical epidemiology: The clinical laboratory information system (LABKA) research database at Aarhus University, Denmark. *Clin. Epidemiol.* 2011;3:133–138.
6. Young JG, Stensrud MJ, Tchetgen Tchetgen EJ, Hernán MA. A causal framework for classical statistical estimands in failure-time settings with competing events. *Stat. Med.* 2020;39:1199–1236.
7. Mccaffrey DF, Griffin BA, Almirall D, Slaughter ME, Ramchand R, Burgette LF. A tutorial on propensity score estimation for multiple treatments using generalized boosted models. *Stat. Med.* 2013;32:3388–3414.

**Supplemental Table 1:** ICD10 codes and ATC-codes

|                                 | International Classification of Diseases 10th revision (ICD-10) code                                                                | Anatomical Therapeutic Chemical (ATC) code |
|---------------------------------|-------------------------------------------------------------------------------------------------------------------------------------|--------------------------------------------|
| <b>Clinical characteristics</b> |                                                                                                                                     |                                            |
| Congestive heart failure        | I11.0 I13.0 I13.2 I42.0 I50                                                                                                         | CO3C                                       |
| Left ventricular dysfunction    | I50.1 I50.9                                                                                                                         |                                            |
| Hypertension                    |                                                                                                                                     | See specified definition*                  |
| Diabetes mellitus               | E10.0 E10.1 E10.9 E11.0 E11.1 E11.9                                                                                                 | A10                                        |
| Ischemic stroke                 | I63 I64                                                                                                                             |                                            |
| Systemic embolism               | I74                                                                                                                                 |                                            |
| Transient ischemic attack       | G45                                                                                                                                 |                                            |
| Aortic plaque                   | I70.0                                                                                                                               |                                            |
| Peripheral arterial disease     | I70.2-I70.9 I71 I73.9 I74                                                                                                           |                                            |
| Myocardial infarction           | I21-I23                                                                                                                             |                                            |
| Chronic kidney disease          | I12 I13 N00-N05 N07 N11 N14 N17-N19 Q61                                                                                             |                                            |
| Liver disease                   | B15.0 B16.0 B16.2 B19.0 K70.4 K72 K76.6 I85                                                                                         |                                            |
| Major bleeding                  | D62 J492 H356 H431 N02 R04 R31 G951A H052A H313 H450 I312                                                                           |                                            |
| Intracranial bleeding           | I60 I61 I62 I690 I691 I692                                                                                                          |                                            |
| Gastrointestinal bleeding       | K250 K252 K254 K260 K262 K264 K270 K272 K274 K280 K282 K290 K921 K922 I850 I864A K228F K284 K298A K625 K638B K638C K661 K838F K868G |                                            |
| Alcohol intake                  | E22.4 E52.9A F10 G31.2 G62.1 G72.1 I42.6 K29.2 K70 K86.0 L27.8A O35.4M T51 Z71.4 Z72.1                                              |                                            |
| Atrial fibrillation             | I48                                                                                                                                 |                                            |

|                                                    |                                                                                                              |                                                                               |
|----------------------------------------------------|--------------------------------------------------------------------------------------------------------------|-------------------------------------------------------------------------------|
| Alcohol abuse                                      | E244 E529A F10 G312 G621<br>G721 I426 K292 K70 K860<br>L278A O354 T51 Z714 Z721                              |                                                                               |
| Cancer diagnosis                                   | C                                                                                                            |                                                                               |
| CPD                                                | J40 J41 J42 J43 J44 J45 J46 J47<br>J60 J61 J62 J63 J64 J65 J67 J684<br>J701 J703 J841 J920 J921 J982<br>J983 |                                                                               |
| Ischemic heart disease                             | I20 I21 I22 I23 I24 I25                                                                                      |                                                                               |
| CABG procedure                                     | KFNA KFNC KFND KFNE                                                                                          |                                                                               |
| PCI procedure                                      | KFNG                                                                                                         |                                                                               |
| <b>Medication information</b>                      |                                                                                                              |                                                                               |
| Dabigatran                                         |                                                                                                              | B01AE07                                                                       |
| Rivaroxaban                                        |                                                                                                              | B01AE07                                                                       |
| Apixaban                                           |                                                                                                              | B01AF02                                                                       |
| Edoxaban                                           |                                                                                                              | B01AF03                                                                       |
| Warfarin                                           |                                                                                                              | B01AA03                                                                       |
| Aspirin                                            |                                                                                                              | B01AC06                                                                       |
| Clopidogrel                                        |                                                                                                              |                                                                               |
| Beta-blockers                                      |                                                                                                              | C07                                                                           |
| Calcium channel blockers                           |                                                                                                              | C07F C08 C09BB C09DB                                                          |
| Renin-angiotensin system inhibitors<br>(ACEi/ARBs) |                                                                                                              | C09                                                                           |
| Loop diuretics                                     |                                                                                                              | C03C                                                                          |
| Statin                                             |                                                                                                              | C10                                                                           |
| NSAID                                              |                                                                                                              | M01AA M01AB M01AC M01AE<br>M01AG M01AH M01AX01                                |
| Non-loop diuretics                                 |                                                                                                              | C02DA C02L C03A C03B C03D<br>C03EA C03X C07C C07D C08G<br>C09BA C09DA C09XA52 |

|                                        |                                 |                                                               |
|----------------------------------------|---------------------------------|---------------------------------------------------------------|
| PGP inhibitors                         |                                 | J02AB02 J02AC02 L04AD02<br>L04AD01 C08DA01 C01BD01<br>J01FA09 |
| CYP-PGP inhibitors                     |                                 | J02AB02 J02AC02 J05AE10<br>J05AE08 J05AR14 J05AR15<br>J02AC01 |
| Proton-pump inhibitors                 |                                 | A02BC                                                         |
| Vasodilators                           |                                 | C02DB C02DD C02DG C04 C05                                     |
| Calcium                                |                                 | C07F C08 C09BB C09DB                                          |
| Estimated glomerular filtration rate** | DNK35301; DNK35302;<br>NPU04998 |                                                               |

\*We identified subjects with hypertension from combination treatment with at least two of the following classes of antihypertensive drugs:

I. Alpha adrenergic blockers (C02A, C02B, C02C)

II. Non-loop diuretics (C02DA, C02L, C03A, C03B, C03D, C03E, C03X, C07C, C07D, C08G, C09BA, C09DA, C09XA52)

III. Vasodilators (C02DB, C02DD, C02DG, C04, C05)

IV. Beta blockers (C07)

V. Calcium channel blockers (C07F, C08, C09BB, C09DB)

VI. Renin-angiotensin system inhibitors (C09).

\*\* Obtained from the Danish National Laboratory Registry

**Supplemental Table 2:** Number of events and event rates per 100 person-years for each component in the safety outcome

| <b>Outcome</b>                            | Number of events | 100 Person-years | Crude event rate |
|-------------------------------------------|------------------|------------------|------------------|
| <b>Gastrointestinal bleeding</b>          | 105              | 82.92            | 1.27             |
| Edoxaban 30mg                             | 10               | 4.81             | 2.08             |
| Edoxaban 60mg                             | 20               | 16.71            | 1.20             |
| Warfarin                                  | 75               | 61.40            | 1.22             |
| <b>Intracranial bleeding</b>              | 32               | 83.62            | 0.38             |
| Edoxaban 30mg                             | <5               | -                | 0.41             |
| Edoxaban 60mg                             | 6                | 16.83            | 0.36             |
| Warfarin                                  | 24               | 61.93            | 0.39             |
| <b>Bleeding in other anatomical sites</b> | 175              | 82.09            | 2.13             |
| Edoxaban 30mg                             | 7                | 4.81             | 1.45             |
| Edoxaban 60mg                             | 39               | 16.59            | 2.35             |
| Warfarin                                  | 129              | 60.69            | 2.13             |

**Supplemental Table 3:** Subgroup analyses of comparative effectiveness and safety outcomes in inverse probability weighted populations

| Subgroup analysis              | Number of patients included | Hazard ratios (95% confidence interval) |                     |                     |
|--------------------------------|-----------------------------|-----------------------------------------|---------------------|---------------------|
|                                |                             | Stroke                                  | Bleeding            | All-cause mortality |
| <b>OAC naïve</b>               |                             |                                         |                     |                     |
| Edoxaban 60 mg                 | 815                         | 0.99 (0.47 to 2.08)                     | 1.10 (0.71 to 1.71) | 0.58 (0.37 to 0.89) |
| Warfarin                       | 2883                        | Reference                               |                     |                     |
| <b>Age 75 years or older</b>   |                             |                                         |                     |                     |
| Edoxaban 60 mg                 | 755                         | 0.97 (0.48 to 1.97)                     | 1.42 (0.89 to 2.28) | 0.54 (0.36 to 0.82) |
| Warfarin                       | 1655                        | Reference                               |                     |                     |
| <b>High risk of stroke</b>     |                             |                                         |                     |                     |
| Edoxaban 60 mg                 | 680                         | 1.22 (0.66 to 2.26)                     | 0.98 (0.57 to 1.68) | 0.57 (0.40 to 0.83) |
| Warfarin                       | 1501                        | Reference                               |                     |                     |
| <b>Affected renal function</b> |                             |                                         |                     |                     |
| Edoxaban 60 mg                 | 1266                        | 1.09 (0.60 to 1.97)                     | 1.08 (0.74 to 1.59) | 0.64 (0.45 to 0.90) |
| Warfarin                       | 2498                        | Reference                               |                     |                     |

**Supplemental Table 4:** Characteristics of patients with atrial fibrillation according to treatment regimen with warfarin (dose adjusted) after propensity matching

| Patient characteristics                                   | Warfarin      | Edoxaban 30 mg |
|-----------------------------------------------------------|---------------|----------------|
| No.                                                       | 456           | 456            |
| Women % (N)                                               | 64.3 (293)    | 62.1 (283)     |
| Age, mean (SD)                                            | 82.0 (8.7)    | 81.6 (8.1)     |
| Ischemic stroke                                           | 13.6 (62)     | 14.3 (65)      |
| Hypertension                                              | 66.9 (305)    | 67.1 (306)     |
| Heart failure or LVD                                      | 37.3 (170)    | 37.9 (173)     |
| Diabetes                                                  | 19.1 (87)     | 18.4 (84)      |
| Ischemic heart disease                                    | 27.2 (124)    | 30.3 (138)     |
| Intracranial bleeding                                     | - (<5)        | 1.1 (5)        |
| Gastrointestinal bleeding                                 | 6.1 (28)      | 3.7 (17)       |
| Median CHA <sub>2</sub> DS <sub>2</sub> -VASc score (IQR) | 4.0 (3.0-5.0) | 4.0 (3.0-5.0)  |
| Score 0-2                                                 | 11.4 (52)     | 9.9 (45)       |
| Score 3-5                                                 | 66.0 (301)    | 69.3 (316)     |
| Score >5                                                  | 22.6 (103)    | 20.8 (95)      |

|                                                           |               |               |
|-----------------------------------------------------------|---------------|---------------|
| Median HAS BLED score (IQR)                               | 3.0 (2.0-3.0) | 2.0 (2.0-3.0) |
| Score 0-1                                                 | 16.0 (73)     | 20.0 (91)     |
| Score 2-3                                                 | 66.0 (301)    | 62.3 (284)    |
| Score >3                                                  | 18.0 (82)     | 17.8 (81)     |
| Cancer (ever)                                             | 25.2 (115)    | 28.9 (132)    |
| Cancer diagnosed within 3 years                           | 11.4 (52)     | 12.7 (58)     |
| Mean creatinine clearance, ml/min/1.73m <sup>2</sup> (SD) | 56.5 (20.1)   | 55.5 (19.2)   |
| <b>Medication</b>                                         |               |               |
| OAC naïve                                                 | 44.7 (204)    | 41.4 (189)    |
| Warfarin                                                  | 0.0 (0)       | 37.7 (172)    |
| Apixaban                                                  | 24.6 (112)    | 8.1 (37)      |
| Dabigatran                                                | 9.6 (44)      | 7.0 (32)      |
| Rivaroxaban                                               | 24.1 (110)    | 10.1 (46)     |
| Aspirin                                                   | 25.4 (116)    | 23.2 (106)    |

|                                |            |            |
|--------------------------------|------------|------------|
| Clopidogrel                    | 10.7 (49)  | 10.3 (47)  |
| Proton-pump<br>inhibitors      | 38.2 (174) | 33.6 (153) |
| Beta blocker                   | 68.4 (312) | 70.0 (319) |
| Non-loop diuretic              | 44.5 (203) | 44.7 (204) |
| Calcium channel<br>blocker     | 35.3 (161) | 33.8 (154) |
| Renin-angiotensin<br>inhibitor | 54.4 (248) | 53.9 (246) |
| NSAID                          | 16.9 (77)  | 9.4 (43)   |

SD: Standard deviation. IQR: Interquartile range. LVD: Left ventricular dysfunction. OAC: Oral anticoagulant. NSAID: Nonsteroidal anti-inflammatory drugs.

**Figure 1:** Flowchart of the study population

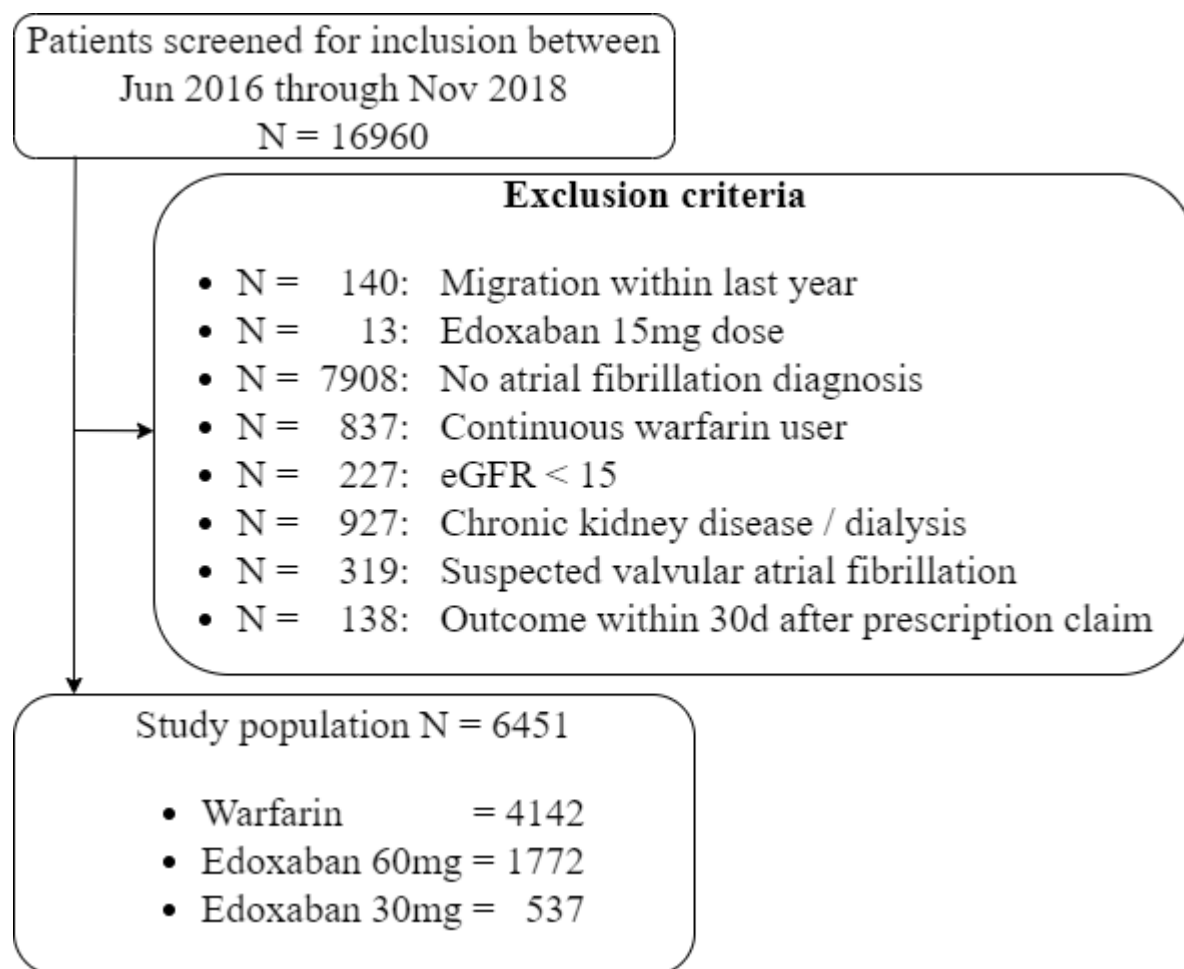

**Supplemental Figure 2:** Propensity score plot for edoxaban 30mg and warfarin users

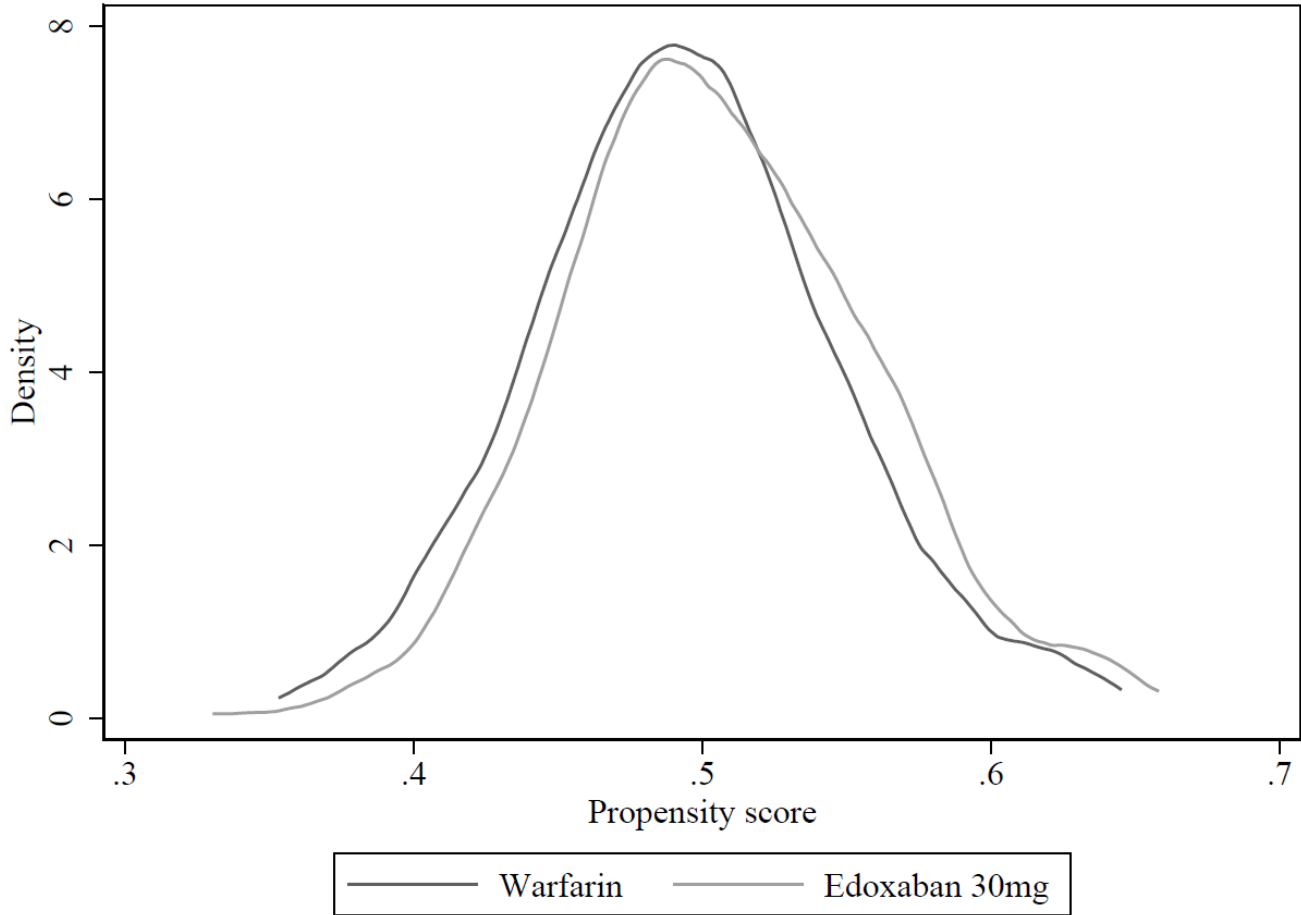

**Supplemental Figure 3:** Standardized event free survival curves of thromboembolism after propensity score matching

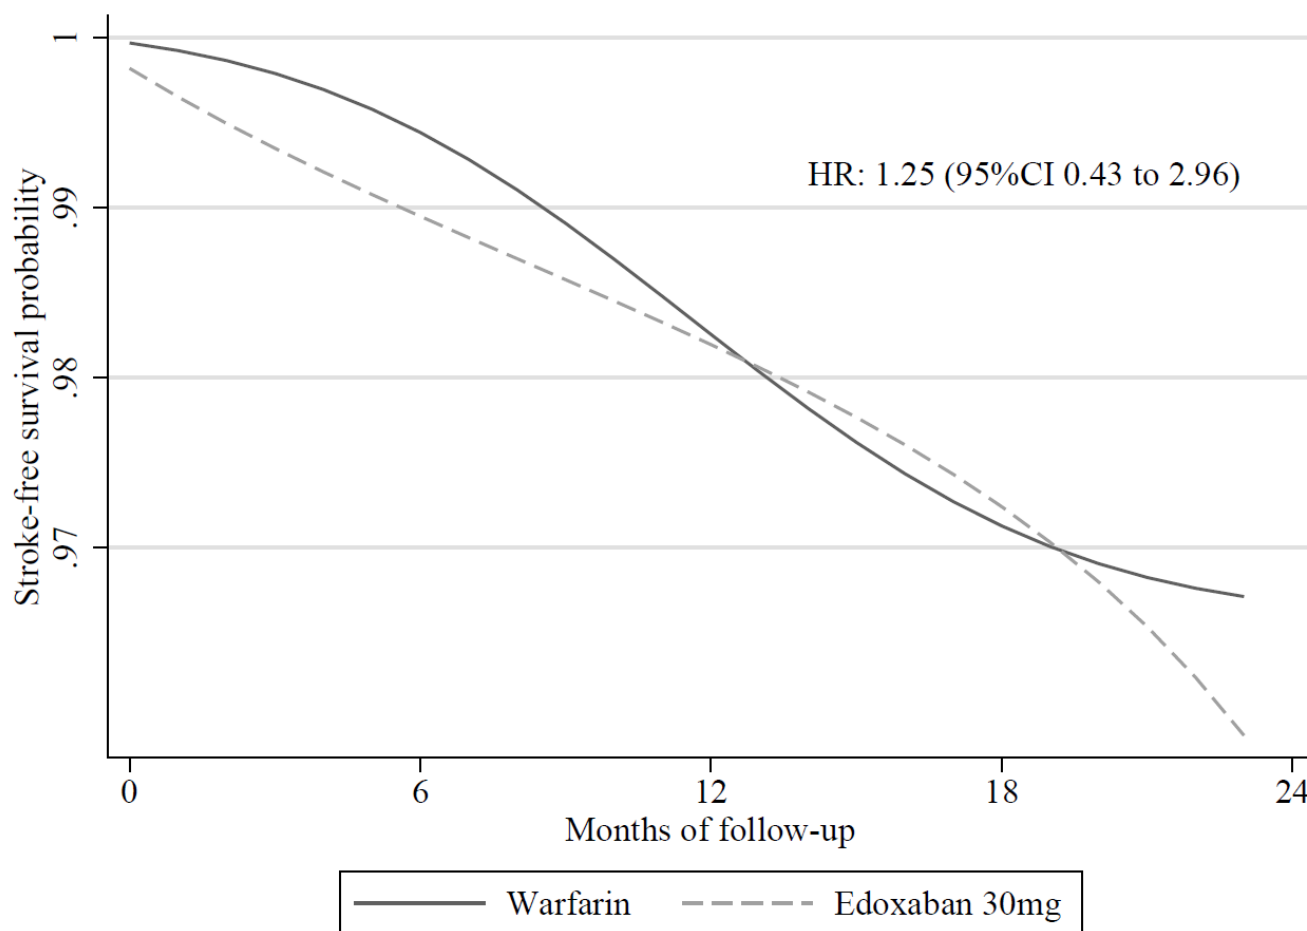

**Supplemental Figure 4:** Standardized survival curves for all-cause mortality after propensity score matching

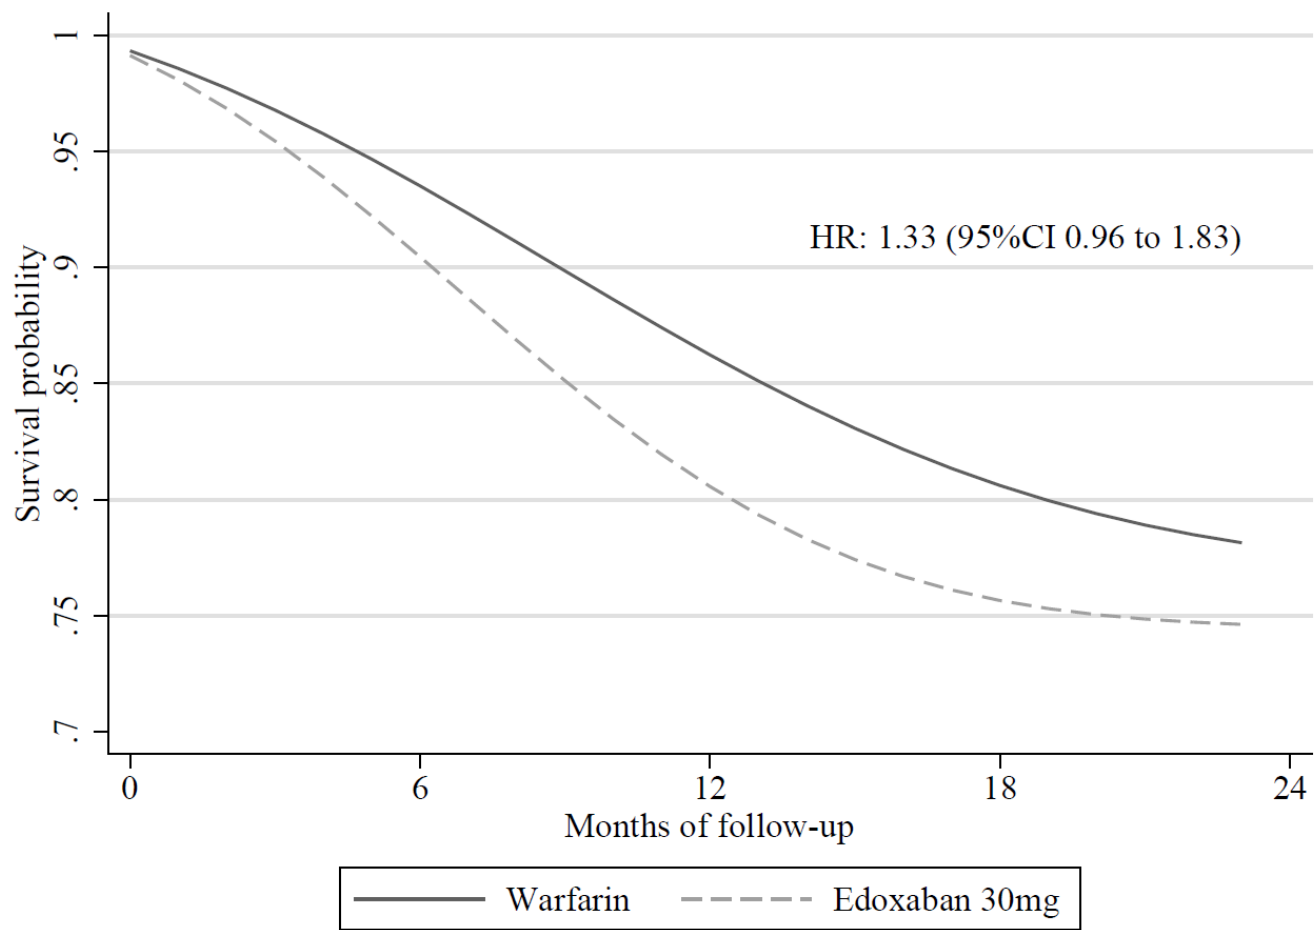

**Supplemental Figure 5:** Standardized event free survival curves of bleeding outcome after propensity score matching

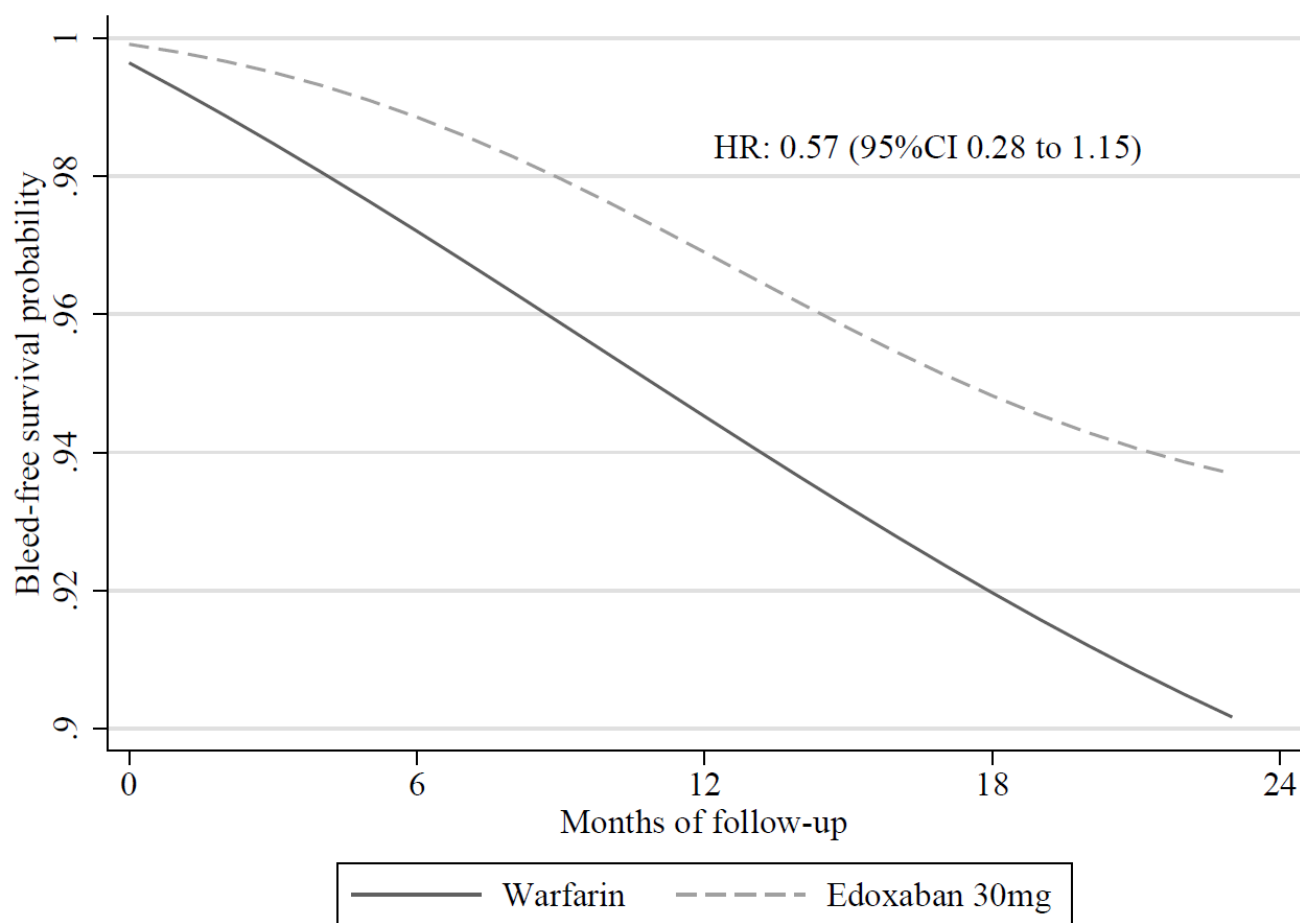

Supplement: Supplementary file 1 [file 28835923 › Supplemental information (2).pdf]
