# Supplementary material
Source: publisher figshare collection journal article supplement (https://sage.figshare.com/ndownloader/files/28835923)
Supplement: Supplementary file 1 [file 28835923]

Archive with 1 entries (1 files):
- Supplemental information (2).pdf
